# Supplementary material for: Performance and validation of a digital memory test across the Alzheimer’s Disease continuum
Source: bioRxiv or medRxiv preprint supplement (doi:10.1101/2024.06.18.24309112), 2024-06-19
Supplement: Supplementary file [file media-1.pdf]

**SUPPLEMENTARY MATERIALS**

|                         | EHC        | SCI        | MCI            | AD             | p-value<br>all | p-value<br>EHC/SCI | p-value<br>SCI/MCI | p-value<br>MCI/A<br>D |
|-------------------------|------------|------------|----------------|----------------|----------------|--------------------|--------------------|-----------------------|
| <b>Age</b>              | 66.6 (7.5) | 59.9 (8.6) | 69.3<br>(11.5) | 69.8<br>(11.2) | *0.040         | 0.165              | 0.065              | 1                     |
| <b>Gender<br/>(M/F)</b> | 6/15       | 8/7        | 8/4            | 5/7            | 0.175          | 0.714              | 1                  | 0.877                 |
| <b>Educatio<br/>n</b>   | 15.8 (3.6) | 15.9 (5.2) | 14.0 (4.7)     | 15.5 (6.2)     | 0.448          | 1                  | 1                  | 1                     |
| <b>ACE</b>              | 97.4 (2.0) | 94.3 (3.5) | 86.7 (7.7)     | 71.7 (5.2)     | *<0.001        | 0.052              | *<0.001            | *<0.001               |
| <b>DS</b>               | 17.7 (2.9) | 18.2 (3.8) | 17.2 (4.8)     | 13.8 (2.2)     | *0.007         | 1                  | 1                  | 0.079                 |

**Table S1 | Demographics and tests – longitudinal subset**

|                         | EHC        | SCI        | MCI            | AD             | p-value<br>all | p-value<br>EHC/SCI | p-value<br>SCI/MCI | p-value<br>MCI/A<br>D |
|-------------------------|------------|------------|----------------|----------------|----------------|--------------------|--------------------|-----------------------|
| <b>Age</b>              | 66.6 (7.5) | 57.7 (7.2) | 65.8<br>(11.3) | 69.2 (9.7)     | *<0.001        | *<0.001            | *0.048             | 0.546                 |
| <b>Gender<br/>(M/F)</b> | 24/37      | 14/17      | 4/5            | 22/15          | 0.285          | 0.592              | 0.969              | 0.415                 |
| <b>Educatio<br/>n</b>   | 16.2 (3.8) | 16.0 (4.5) | 16.6 (4.4)     | 14.1 (3.6)     | *0.046         | 1                  | 1                  | 0.411                 |
| <b>ACE</b>              | 97.2 (2.5) | 93.9 (5.7) | 89.6 (3.9)     | 70.5<br>(19.3) | *<0.001        | 0.335              | 0.335              | *<0.001               |

**Table S2 | Demographics and tests – neuroimaging sample**

P-values are derived by the between-group ANOVA (p-value all) with subsequent Holm post-hoc comparisons (p-value EHC/SCI, p-value SCI/MCI, p-value MCI/AD).

**EFFECTS OF SET SIZE AND DELAY**

|                                    | <b>Set size</b>                                       | <b>Delay</b>                                         | <b>Set size x Delay</b>                             |
|------------------------------------|-------------------------------------------------------|------------------------------------------------------|-----------------------------------------------------|
| <b>Identification Time</b>         | F = 493.6, * <b>p &lt; 0.001</b><br>$\eta^2 = 0.466$  | F = 122.0, * <b>p &lt; 0.001</b><br>$\eta^2 = 0.037$ | F = 4.1, * <b>p = 0.043</b><br>$\eta^2 = 0.001$     |
| <b>Localization Time</b>           | F = 423.2, * <b>p &lt; 0.001</b><br>$\eta^2 = 0.416$  | F = 161.8, * <b>p &lt; 0.001</b><br>$\eta^2 = 0.046$ | F = 1.8, p = 0.186                                  |
| <b>Identification Accuracy</b>     | F = 1298.7, * <b>p &lt; 0.001</b><br>$\eta^2 = 0.624$ | F = 168.2, * <b>p &lt; 0.001</b><br>$\eta^2 = 0.043$ | F = 20.7, * <b>p &lt; 0.001</b><br>$\eta^2 = 0.006$ |
| <b>Absolute Localization Error</b> | F = 1625.5, * <b>p &lt; 0.001</b><br>$\eta^2 = 0.726$ | F = 109.5, * <b>p &lt; 0.001</b><br>$\eta^2 = 0.019$ | F = 35.0, * <b>p &lt; 0.001</b><br>$\eta^2 = 0.005$ |
| <b>Target detection</b>            | F = 3088.8, * <b>p &lt; 0.001</b><br>$\eta^2 = 0.845$ | F = 34.1, * <b>p &lt; 0.001</b><br>$\eta^2 = 0.004$  | F = 0.008, p = 0.927                                |
| <b>Misbinding</b>                  | N/A                                                   | F = 0.3, p = 0.577                                   | N/A                                                 |
| <b>Guessing</b>                    | F = 145.0, * <b>p &lt; 0.001</b><br>$\eta^2 = 0.211$  | F = 96.6, * <b>p &lt; 0.001</b><br>$\eta^2 = 0.045$  | F = 1.3, p = 0.249                                  |
| <b>Imprecision</b>                 | F = 49.6, * <b>p &lt; 0.001</b><br>$\eta^2 = 0.085$   | F = 78.8, * <b>p &lt; 0.001</b><br>$\eta^2 = 0.043$  | F = 5.0, * <b>p = 0.001</b><br>$\eta^2 = 0.002$     |

**Table S3 | Cross-sectional analysis of Set size and Delay effects**

Set size (1 vs 3 items), Delay (1 vs 4 seconds), N/A = not applicable.

|                  | Metric                             | Set size                                              | Delay                                                | Set size x Delay                                    |
|------------------|------------------------------------|-------------------------------------------------------|------------------------------------------------------|-----------------------------------------------------|
| <b>Group EHC</b> | <b>Identification Time</b>         | F = 572.5, * <b>p &lt; 0.001</b><br>$\eta^2 = 0.641$  | F = 118.3, * <b>p &lt; 0.001</b><br>$\eta^2 = 0.051$ | F = 6.0, * <b>p = 0.016</b><br>$\eta^2 = 0.002$     |
|                  | <b>Localization Time</b>           | F = 580.2, * <b>p &lt; 0.001</b><br>$\eta^2 = 0.634$  | F = 176.7, * <b>p &lt; 0.001</b><br>$\eta^2 = 0.070$ | F = 2.4, p = 0.125                                  |
|                  | <b>Identification Accuracy</b>     | F = 664.2, * <b>p &lt; 0.001</b><br>$\eta^2 = 0.605$  | F = 89.5, * <b>p &lt; 0.001</b><br>$\eta^2 = 0.057$  | F = 23.9, * <b>p &lt; 0.001</b><br>$\eta^2 = 0.013$ |
|                  | <b>Absolute Localization Error</b> | F = 827.3, * <b>p &lt; 0.001</b><br>$\eta^2 = 0.732$  | F = 64.2, * <b>p &lt; 0.001</b><br>$\eta^2 = 0.022$  | F = 28.5, * <b>p &lt; 0.001</b><br>$\eta^2 = 0.009$ |
|                  | <b>Target detection</b>            | F = 1389.5, * <b>p &lt; 0.001</b><br>$\eta^2 = 0.838$ | F = 27.6, * <b>p &lt; 0.001</b><br>$\eta^2 = 0.006$  | F = 3.828, p = 0.052                                |
|                  | <b>Misbinding</b>                  | N/A                                                   | F = 6.107, * <b>p = 0.015</b><br>$\eta^2 = 0.038$    | N/A                                                 |
|                  | <b>Guessing</b>                    | F = 229.0, * <b>p &lt; 0.001</b><br>$\eta^2 = 0.444$  | F = 50.1, * <b>p &lt; 0.001</b><br>$\eta^2 = 0.036$  | F = 0.7, p = 0.407                                  |
|                  | <b>Imprecision</b>                 | F = 181.6, * <b>p &lt; 0.001</b><br>$\eta^2 = 0.370$  | F = 49.7, * <b>p &lt; 0.001</b><br>$\eta^2 = 0.042$  | F = 2.3, p = 0.131                                  |
| <b>Group SCI</b> | <b>Identification Time</b>         | F = 125.8, * <b>p &lt; 0.001</b><br>$\eta^2 = 0.592$  | F = 33.8, * <b>p &lt; 0.001</b><br>$\eta^2 = 0.052$  | F = 14.7, * <b>p &lt; 0.014</b><br>$\eta^2 = 0.014$ |
|                  | <b>Localization Time</b>           | F = 107.9, * <b>p &lt; 0.001</b><br>$\eta^2 = 0.554$  | F = 46.6, * <b>p &lt; 0.001</b><br>$\eta^2 = 0.071$  | F = 14.5, * <b>p &lt; 0.001</b><br>$\eta^2 = 0.013$ |
|                  | <b>Identification Accuracy</b>     | F = 152.5, * <b>p &lt; 0.001</b><br>$\eta^2 = 0.590$  | F = 20.2, * <b>p &lt; 0.001</b><br>$\eta^2 = 0.041$  | F = 4.7, * <b>p = 0.035</b><br>$\eta^2 = 0.008$     |
|                  | <b>Absolute Localization Error</b> | F = 212.8, * <b>p &lt; 0.001</b><br>$\eta^2 = 0.732$  | F = 9.3, * <b>p = 0.004</b><br>$\eta^2 = 0.010$      | F = 4.5, * <b>p = 0.038</b><br>$\eta^2 = 0.004$     |
|                  | <b>Target detection</b>            | F = 328.4, * <b>p &lt; 0.001</b><br>$\eta^2 = 0.808$  | F = 2.2, p = 0.148                                   | F = 0.000, p = 0.980                                |
|                  | <b>Misbinding</b>                  | N/A                                                   | F = 0.1, p = 0.703                                   | N/A                                                 |
|                  | <b>Guessing</b>                    | F = 58.9, * <b>p &lt; 0.001</b><br>$\eta^2 = 0.420$   | F = 6.9, * <b>p = 0.011</b><br>$\eta^2 = 0.020$      | F = 1.1, p = 0.308                                  |
|                  | <b>Imprecision</b>                 | F = 38.5, * <b>p &lt; 0.001</b><br>$\eta^2 = 0.334$   | F = 6.0, * <b>p = 0.018</b><br>$\eta^2 = 0.019$      | F = 0.6, p = 0.450                                  |
| <b>Group MCI</b> | <b>Identification Time</b>         | F = 114.5, * <b>p &lt; 0.001</b><br>$\eta^2 = 0.546$  | F = 15.0, * <b>p &lt; 0.001</b><br>$\eta^2 = 0.019$  | F = 1.5, p = 0.222                                  |
|                  | <b>Localization Time</b>           | F = 108.0, * <b>p &lt; 0.001</b><br>$\eta^2 = 0.524$  | F = 14.3, * <b>p &lt; 0.001</b><br>$\eta^2 = 0.022$  | F = 0.8, p = 0.385                                  |

|                 |                                    |                                                      |                                                     |                                                 |
|-----------------|------------------------------------|------------------------------------------------------|-----------------------------------------------------|-------------------------------------------------|
|                 | <b>Identification Accuracy</b>     | F = 409.3, * <b>p &lt; 0.001</b><br>$\eta^2 = 0.730$ | F = 27.1, * <b>p &lt; 0.001</b><br>$\eta^2 = 0.030$ | F = 1.5, p = 0.218                              |
|                 | <b>Absolute Localization Error</b> | F = 589.0, * <b>p &lt; 0.001</b><br>$\eta^2 = 0.730$ | F = 10.6, * <b>p = 0.002</b><br>$\eta^2 = 0.009$    | F = 4.2, * <b>p = 0.046</b><br>$\eta^2 = 0.003$ |
|                 | <b>Target detection</b>            | F = 948.7, * <b>p &lt; 0.001</b><br>$\eta^2 = 0.889$ | F = 1.0, p = 0.309                                  | F = 1.784, p = 0.187                            |
|                 | <b>Misbinding</b>                  | N/A                                                  | F = 2.8, p = 0.099                                  | N/A                                             |
|                 | <b>Guessing</b>                    | F = 27.0, * <b>p &lt; 0.001</b><br>$\eta^2 = 0.201$  | F = 20.5, * <b>p &lt; 0.001</b><br>$\eta^2 = 0.070$ | F = 0.3, p = 0.560                              |
|                 | <b>Imprecision</b>                 | F = 19.4, * <b>p &lt; 0.001</b><br>$\eta^2 = 0.142$  | F = 17.9, * <b>p &lt; 0.001</b><br>$\eta^2 = 0.069$ | F = 0.2, p = 0.618                              |
| <b>Group AD</b> | <b>Identification Time</b>         | F = 27.1, * <b>p &lt; 0.001</b><br>$\eta^2 = 0.211$  | F = 12.0, * <b>p &lt; 0.001</b><br>$\eta^2 = 0.029$ | F = 0.7, p = 0.413                              |
|                 | <b>Localization Time</b>           | F = 21.5, * <b>p &lt; 0.001</b><br>$\eta^2 = 0.164$  | F = 16.9, * <b>p &lt; 0.001</b><br>$\eta^2 = 0.033$ | F = 0.1, p = 0.748                              |
|                 | <b>Identification Accuracy</b>     | F = 322.2, * <b>p &lt; 0.001</b><br>$\eta^2 = 0.661$ | F = 32.8, * <b>p &lt; 0.001</b><br>$\eta^2 = 0.039$ | F = 0.4, p = 0.534                              |
|                 | <b>Absolute Localization Error</b> | F = 288.6, * <b>p &lt; 0.001</b><br>$\eta^2 = 0.683$ | F = 33.4, * <b>p &lt; 0.001</b><br>$\eta^2 = 0.036$ | F = 3.0, p = 0.081                              |
|                 | <b>Target detection</b>            | F = 816.3, * <b>p &lt; 0.001</b><br>$\eta^2 = 0.871$ | F = 8.1, * <b>p = 0.006</b><br>$\eta^2 = 0.004$     | F = 2.798, p = 0.099                            |
|                 | <b>Misbinding</b>                  | N/A                                                  | F = 0.9, p = 0.341                                  | N/A                                             |
|                 | <b>Guessing</b>                    | F = 0.6, * <b>p = 0.443</b><br>$\eta^2 = 0.006$      | F = 26.6, * <b>p &lt; 0.001</b><br>$\eta^2 = 0.069$ | F = 0.9, p = 0.342                              |
|                 | <b>Imprecision</b>                 | F = 2.0, p = 0.001<br>$\eta^2 = 0.020$               | F = 22.1, * <b>p &lt; 0.001</b><br>$\eta^2 = 0.061$ | F = 4.3, * <b>p = 0.042</b><br>$\eta^2 = 0.009$ |

**Table S4 | Group-by-group Set size and Delay effects**

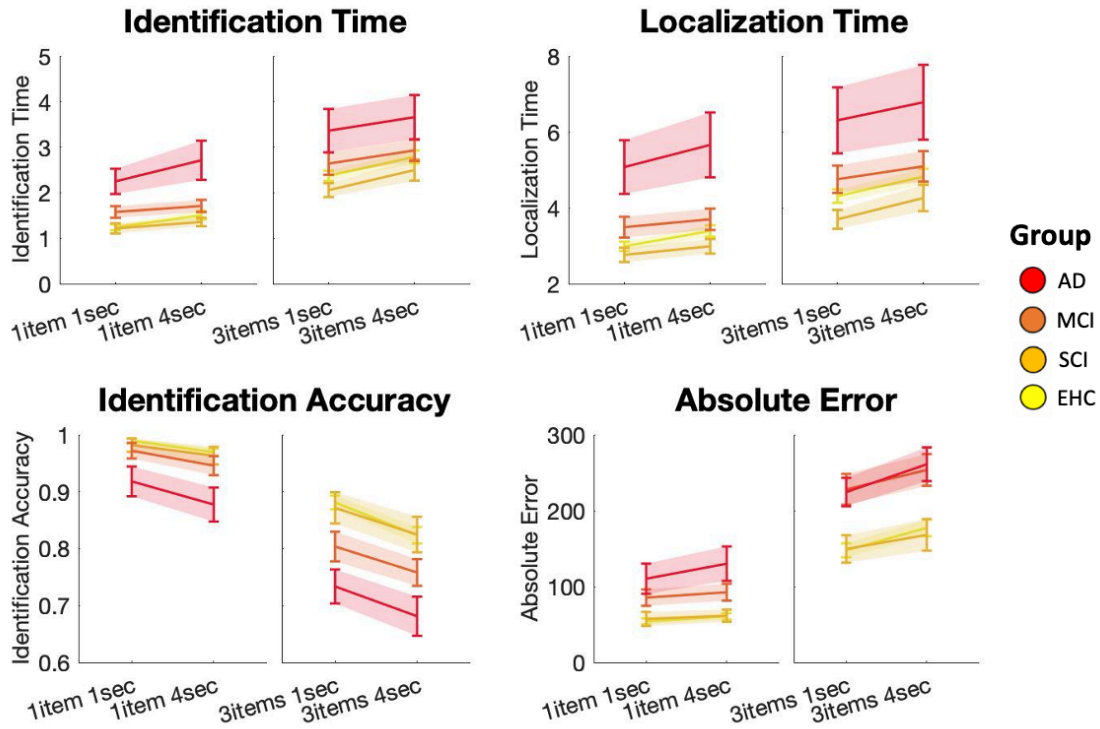

**Figure S1 | Transdiagnostic analysis: Effects of Set Size and Delay-basic metrics**

EHC = yellow, SCI = light orange, MCI = dark orange, AD = red.

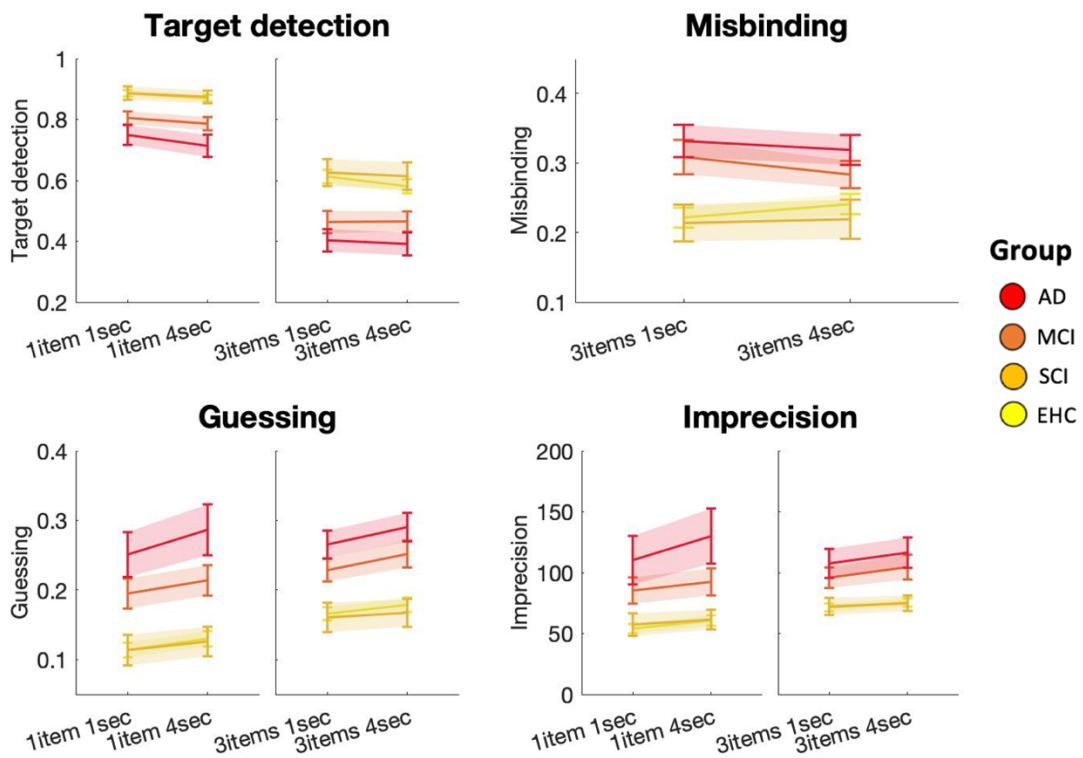

**Figure S2 | Transdiagnostic analysis: Effects of Set Size and Delay- mixture model metrics**

EHC = yellow, SCI = light orange, MCI = dark orange, AD = red.

|                             | Group                                          | Session                                       | Group x Session                               |
|-----------------------------|------------------------------------------------|-----------------------------------------------|-----------------------------------------------|
| Identification Accuracy     | F = 46.6, *p < 0.001<br>η <sup>2</sup> = 0.551 | n.s                                           | n.s                                           |
| Absolute Localization Error | F = 64.9, *p < 0.001<br>η <sup>2</sup> = 0.614 | n.s                                           | F = 3.2, *p = 0.025<br>η <sup>2</sup> = 0.031 |
| Identification Time         | F = 35.0, *p < 0.001<br>η <sup>2</sup> = 0.472 | n.s                                           | n.s                                           |
| Localization Time           | F = 20.3, *p < 0.001<br>η <sup>2</sup> = 0.333 | F = 4.3, *p = 0.039<br>η <sup>2</sup> = 0.024 | n.s                                           |
| Target detection            | F = 72.7, *p < 0.001<br>η <sup>2</sup> = 0.667 | n.s                                           | n.s                                           |
| Guessing                    | F = 67.6, *p < 0.001<br>η <sup>2</sup> = 0.640 | n.s                                           | n.s                                           |
| Misbinding                  | F = 28.9, *p < 0.001<br>η <sup>2</sup> = 0.447 | n.s                                           | n.s                                           |
| Imprecision                 | F = 45.9, *p < 0.001<br>η <sup>2</sup> = 0.507 | n.s                                           | F = 4.8, *p = 0.004<br>η <sup>2</sup> = 0.053 |

**Table S5 | Longitudinal dataset - Group and Session effects**

Session represents baseline session (Time 0) and follow-up session after 1 year. n.s. = not significant.

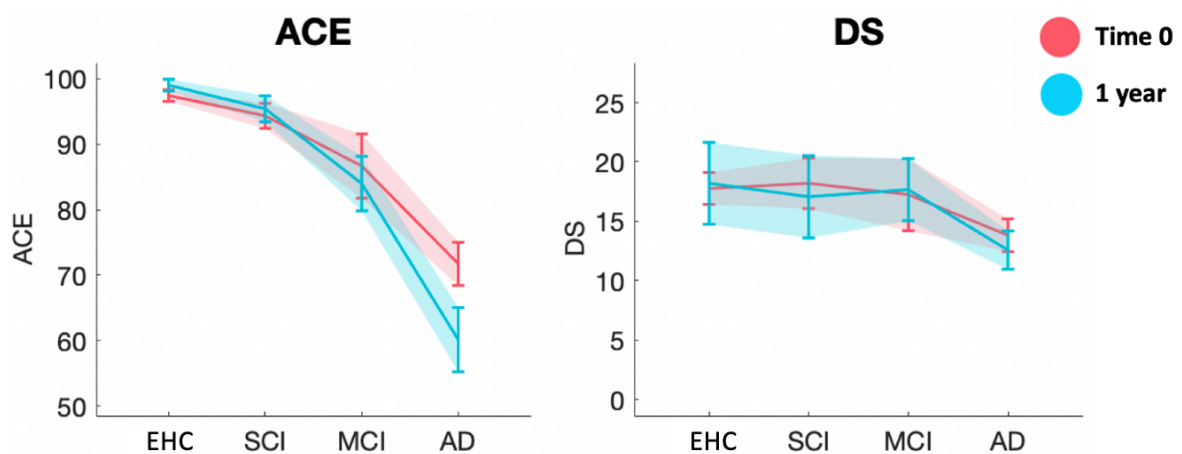

**Figure S3 | Longitudinal analysis of standard neuropsychological tests**

| <b>Decline in ACE scores</b>       |                                                         |
|------------------------------------|---------------------------------------------------------|
| <b>Identification time</b>         | F (1,45), t = 4.5, *p = 0.002, R <sup>2</sup> = 0.3143  |
| <b>Localization time</b>           | F (1,45), t = 4.6, *p = 0.001, R <sup>2</sup> = 0.3239  |
| <b>Identification accuracy</b>     | F (1,45), t = -5.0, *p < 0.001, R <sup>2</sup> = 0.3537 |
| <b>Absolute Localization Error</b> | F (1,45), t = 5.3, *p < 0.001, R <sup>2</sup> = 0.3537  |
| <b>Target detection</b>            | F (1,45), t = -5.2, *p < 0.001, R <sup>2</sup> = 0.3902 |
| <b>Misbinding</b>                  | F (1,45), t = 4.0, *p < 0.001, R <sup>2</sup> = 0.2706  |
| <b>Guessing</b>                    | F (1,45), t = 4.6, *p = 0.005, R <sup>2</sup> = 0.3333  |
| <b>Imprecision</b>                 | F (1,45), t = 5.5, *p < 0.001, R <sup>2</sup> = 0.4107  |

**Table S6 | Longitudinal dataset – prediction of cognitive decline**
